# Supplementary material for: The Health Literacy Status and Its Role in Interventions in Iran: A Systematic and Meta-Analysis
Source: MDPI journal article supplement (doi:10.3390/ijerph18084260), 2021-04-17
Supplement: s1 [file s1]

## Supplementary File

**Table S1.** Inclusion and exclusion criteria.

|                           | Inclusion Criteria                                                                                                                                                                                                                                                                                                                                                                                                      | Exclusion Criteria                                                                                                                                                                             |
|---------------------------|-------------------------------------------------------------------------------------------------------------------------------------------------------------------------------------------------------------------------------------------------------------------------------------------------------------------------------------------------------------------------------------------------------------------------|------------------------------------------------------------------------------------------------------------------------------------------------------------------------------------------------|
| <b>Participants</b>       | Iranian population (women and men) more than 18 years of age                                                                                                                                                                                                                                                                                                                                                            | Iranian women and men under 18 years of age and/ individuals with intellectual disabilities or mental illness                                                                                  |
| <b>Study Type</b>         | Controlled trials, Quantitative designs, quasi-experimental, studies, and pre-test/post-test studies<br>All interventions designed based on HL strategies to improve/ facilitate functional, critical and interactive HL skills for Iranian population.                                                                                                                                                                 | Transversal descriptive studies                                                                                                                                                                |
| <b>Intervention</b>       | This includes patient and health providers coaching, patient prompts and skills workshops to improve individual's ability to promote healthy behaviors and health outcome.<br>Any type of socio-health setting and clinical settings (e.g. primary care, secondary/tertiary care).<br>- Health literacy skills<br>-Social and cognitive skills (self-efficacy, medication adherence, communication skills, self-care..) | HL was not specifically assessed Interventions; Specifically designed to improve HL; Interventions in mental health and oral health, school setting; Intervention protocols were not described |
| <b>Setting</b>            |                                                                                                                                                                                                                                                                                                                                                                                                                         | School setting; Mental health                                                                                                                                                                  |
| <b>Outcomes</b>           | - Knowledge of the disease/problem,<br>- Self-control/management of health problems:<br>- Prevention: preventive behaviors and knowledge participation in preventive measures<br>- Overall state of health: morbidity, mortality, quality of life, physiological indexes, etc.                                                                                                                                          |                                                                                                                                                                                                |
| <b>Dissemination Type</b> | Scientific full text articles published in indexed scientific journals and conferences                                                                                                                                                                                                                                                                                                                                  | Scientific articles before 2000.                                                                                                                                                               |
| <b>Language</b>           | English/Persian<br>Published from ----                                                                                                                                                                                                                                                                                                                                                                                  | Articles written in languages other than English/Persian                                                                                                                                       |
| <b>Others</b>             | - Use of validated measures of HL and health outcome<br>- Assess relationship between HL and health outcome;<br>- Identifiable effect size                                                                                                                                                                                                                                                                              |                                                                                                                                                                                                |

**Table S2.** Joanna Briggs Institute critical appraisal checklist for analytical cross sectional studies.

|   | Critical appraisal checklist                                            | Yes | No | Unclear | Not applicable |
|---|-------------------------------------------------------------------------|-----|----|---------|----------------|
| 1 | Were the criteria for inclusion in the sample clearly defined?          | 45  | 0  | 0       | 0              |
| 2 | Was the exposure measure in valid and reliable way                      | 42  | 0  | 3       | 0              |
| 3 | Were objective, standard criteria used for measurement of the condition | 45  | 0  | 0       | 0              |
| 4 | Were confounding factors identified?                                    | 40  | 5  | 0       | 0              |
| 5 | Were the study subject and the setting described in detail?             | 45  | 0  | 0       | 0              |
| 6 | Were strategies to deal with confounding factor stated?                 | 40  | 5  | 0       | 0              |
| 7 | Was the outcome measured in a valid and reliable way?                   | 45  | 0  | 0       | 0              |
| 8 | Was appropriate statistical analysis used?                              | 45  | 0  | 0       | 0              |

**Table S3:** Characteristics of the HL instrument

| Measure       | Description                                                                                                                                                                                                                                       | Scoring                                                                                      | Internal consistency                                                                                     |
|---------------|---------------------------------------------------------------------------------------------------------------------------------------------------------------------------------------------------------------------------------------------------|----------------------------------------------------------------------------------------------|----------------------------------------------------------------------------------------------------------|
| TOFHLA (6,16) | It included 17 numerical skills items, 50 reading comprehension items                                                                                                                                                                             | For TOFHLA, inadequate (0-59), marginal (60-74) and adequate (75-100).                       | For TOFLHLA: Cronbach's alpha is 79% for numerical skills and 0.88% for reading comprehension section.   |
| STOFHLA (2,6) | STOFHLA: 4 numerical skills items and 36 reading comprehension item.                                                                                                                                                                              | For STOFHLA, Inadequate (0-53 points), marginal (54-66 points) and adequate (67-100 points). | For S-TOFLHLA, Cronbach's alpha was 0.88 for numerical skills and 0.69 for reading comprehension section |
| REALM (7,8)   | Consists of 66 items in area of medical words and health.                                                                                                                                                                                         | Inadequate (0-44), limited (45-60) and adequate (61-66).                                     | Cronbach's alpha coefficients was 0.73.                                                                  |
| NVS (9,59)    | Consists of 6 items that require interpreting a nutrition label for a container of ice cream. The first four questions require numeracy skills and the last two require reading comprehension.                                                    | 0-1 suggests high likelihood of limited HL; possible limited HL (2-3); and adequate HL (4-6) | Cronbach's alph was %0.69 for numerical skills and %0.78 for reading comprehension section               |
| HELIA (64)    | Consist of 33 items with answers according to a 5-point Likert. It loaded indicating a 5-factor solution for the questionnaire namely: access (6 items), reading (4 items), understanding (7 items), appraisal (4 items), and decision (12 items) | Inadequate (0-50), limited (50-66) and adequate (66-84), excellent (84-100)                  | Cronbach's alpha coefficients ranging from 0.72 to 0.89.                                                 |

```
. metareg mean year ,wsse( sd )
```

```
Meta-regression                                Number of obs =      26
REML estimate of between-study variance         tau2              =    26.23
% residual variation due to heterogeneity       I-squared_res    =   10.24%
Proportion of between-study variance explained  Adj R-squared    =   70.88%
With Knapp-Hartung modification
```

| mean  | Coef.     | Std. Err. | t     | P> t  | [95% Conf. Interval] |           |
|-------|-----------|-----------|-------|-------|----------------------|-----------|
| year  | 5.087859  | 1.274795  | 3.99  | 0.001 | 2.456811             | 7.718907  |
| _cons | -10197.44 | 2569.393  | -3.97 | 0.001 | -15500.41            | -4894.474 |

**Figure S1.** Summary of meta-regression result for HL status in patient population.
